# Supplementary material
Source: Springer Nature journal article supplement (https://www.springermedizin.de/resource/supplementary/13014_2012_772_MOESM3_ESM.pdf/9634696)

# Use of Bolus and Boost by Reconstruction Type

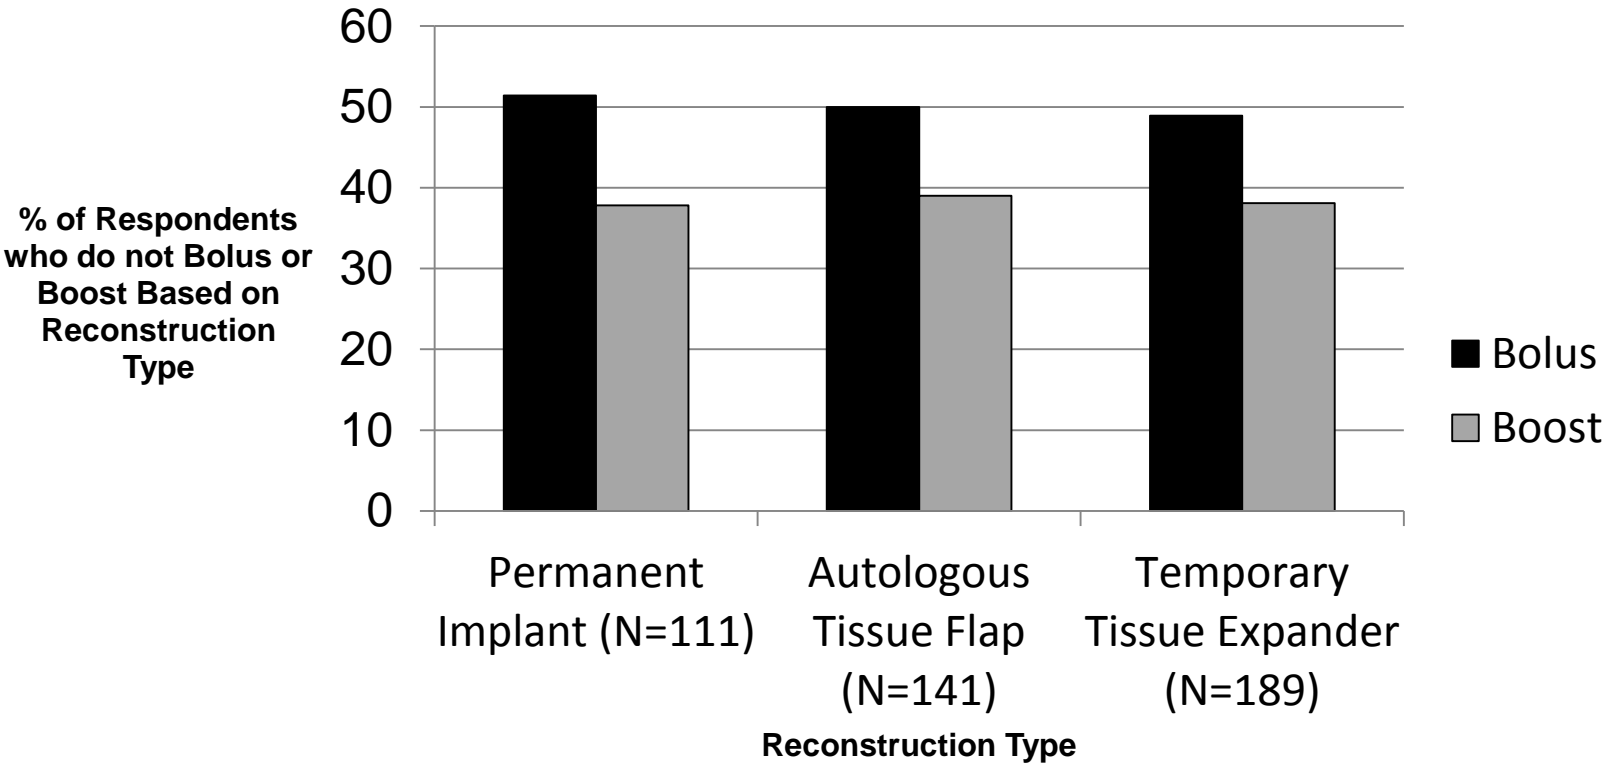

Supplement: MOESM3 [file 9634696]
